# Supplementary material for: Nintedanib Ameliorates Bleomycin-Induced Pulmonary Fibrosis, Inflammation, Apoptosis, and Oxidative Stress by Modulating PI3K/Akt/mTOR Pathway in Mice
Source: PubMed Central journal article supplement (PMC10359208; doi:10.1007/s10753-023-01825-2), 2023-05-09

Figure 6 : GAPDH

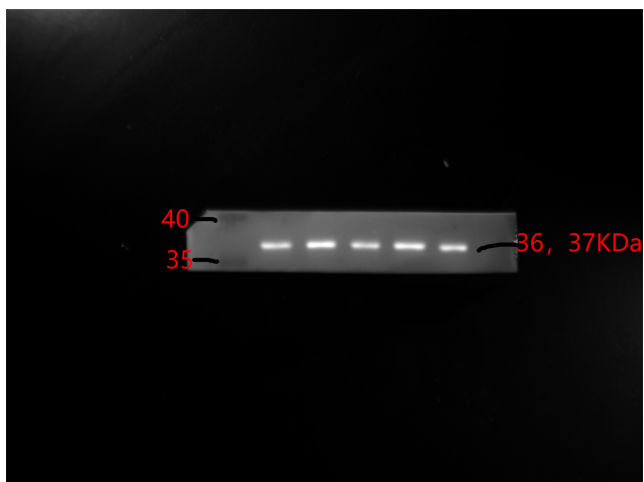

Figure 6 : -SMA

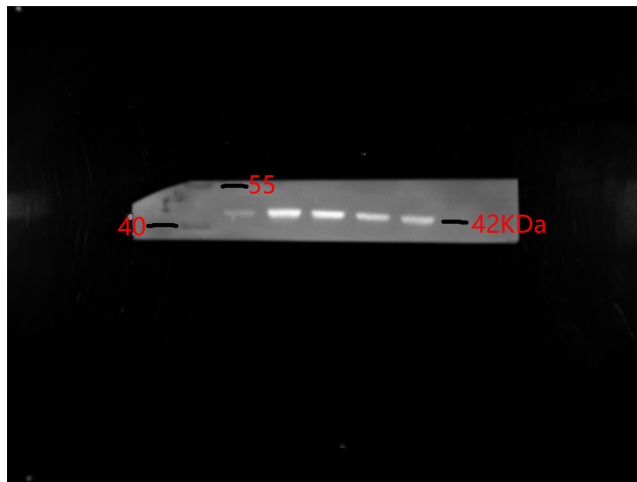

Figure 6 : Col-III

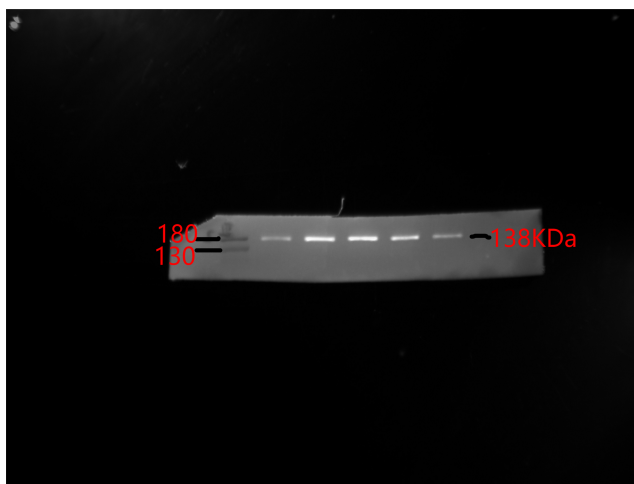

The original image of Figure 6, the pores of each band are Control, Model, nintedanib 30mg/kg, nintedanib 60mg/kg , nintedanib 120mg/kg from left to right. The samples derive from the same experiment and the same time and that gels/blots were processed in parallel. Because the experiment consisted of 5 groups

Figure8:GAPDH

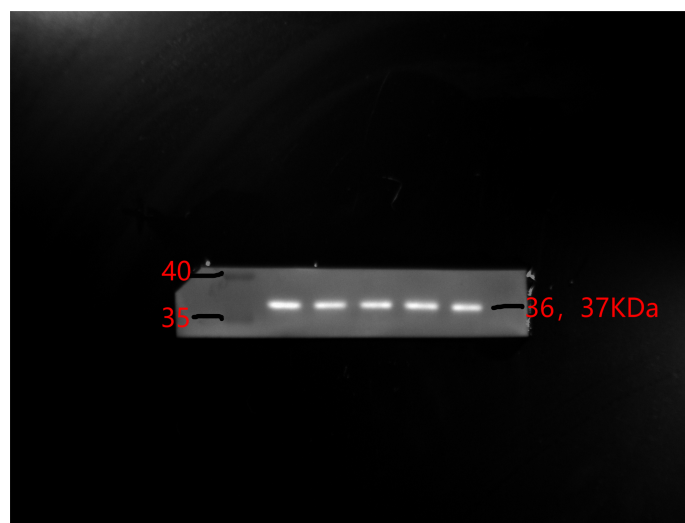

Figure8:Cleaved caspase-3

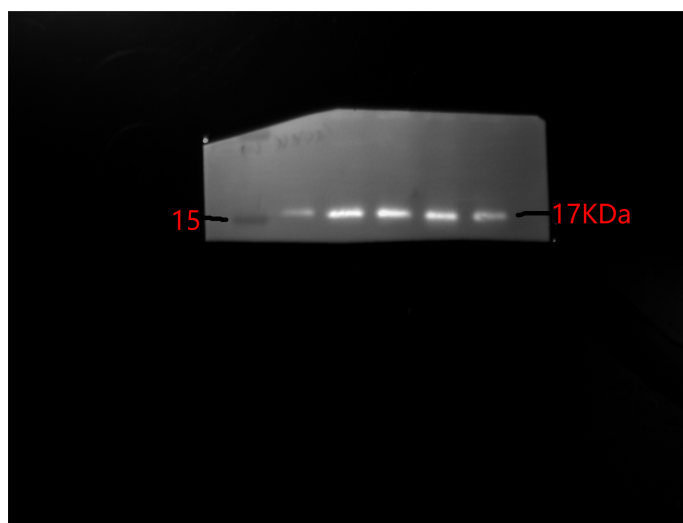

Figure 7 : GAPDH

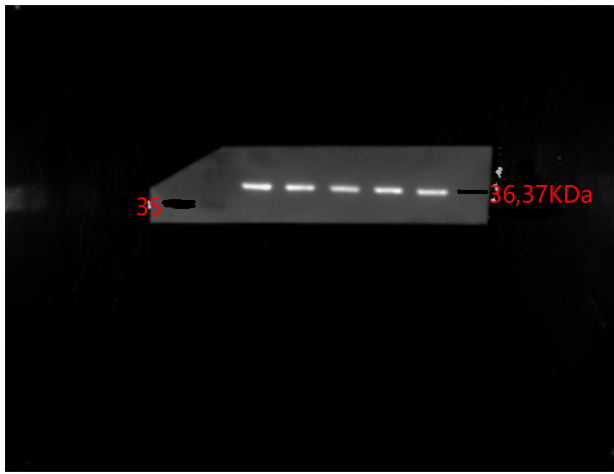

The original image of Figure 6, the pores of each band are Control, Model, nintedanib 30mg/kg, nintedanib 60mg/kg, nintedanib 120mg/kg from left to right. The samples derive from the same experiment and the same time and that gels/blots were processed in parallel. Because the experiment consisted of 5 groups

Figure 7 : PI3K

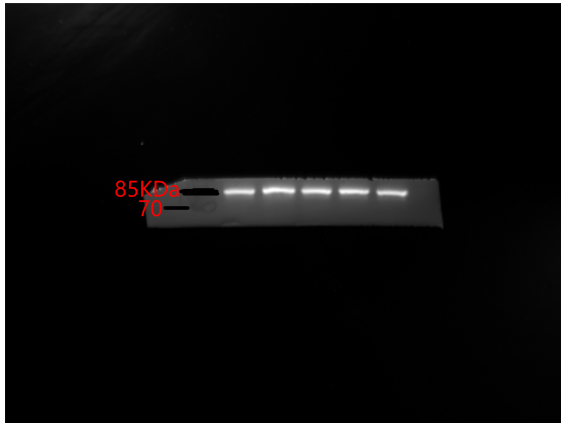

Figure 7 : p-PI3K

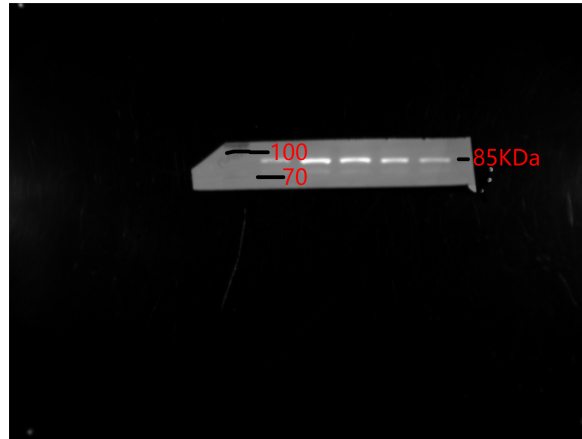

Figure 7 : AKT

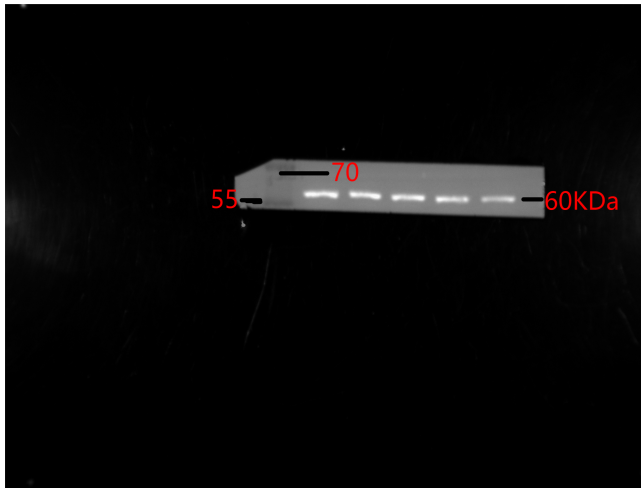

Figure 7 : p-AKT

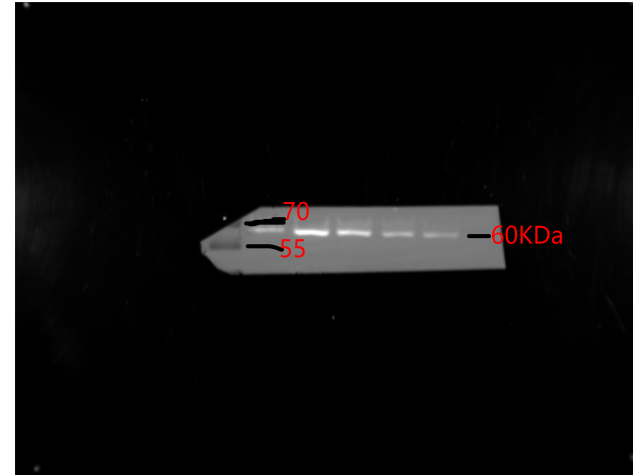

Figure 7 : MTOR

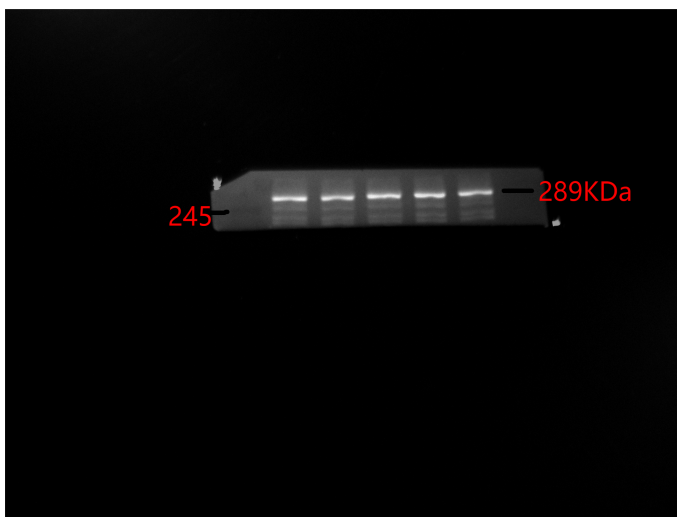

Figure 7 : p-MTOR

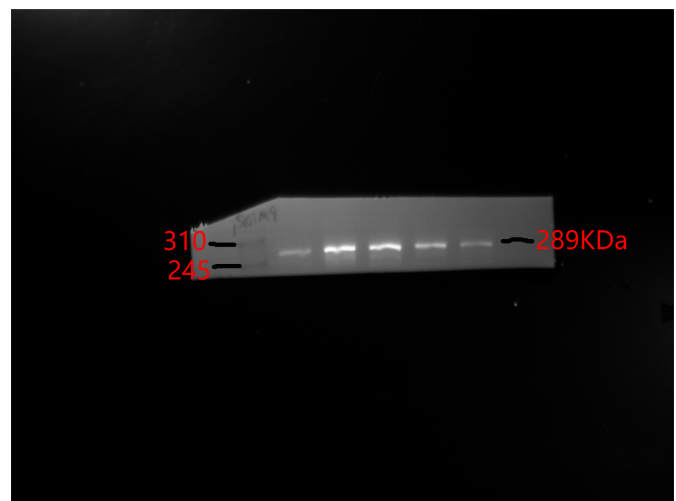

Supplement: 10753_2023_1825_MOESM1_ESM.pdf [file 10753_2023_1825_MOESM1_ESM.pdf]
